# Supplementary material for: Structural basis of chromatin regulation by histone variant H2A.Z
Source: PubMed Central journal article supplement (PMC8565303; doi:10.1093/nar/gkab907), 2021-10-13
Supplement: gkab907_supplemental_file.pdf [file gkab907_supplemental_file.pdf]

## Supplementary Data

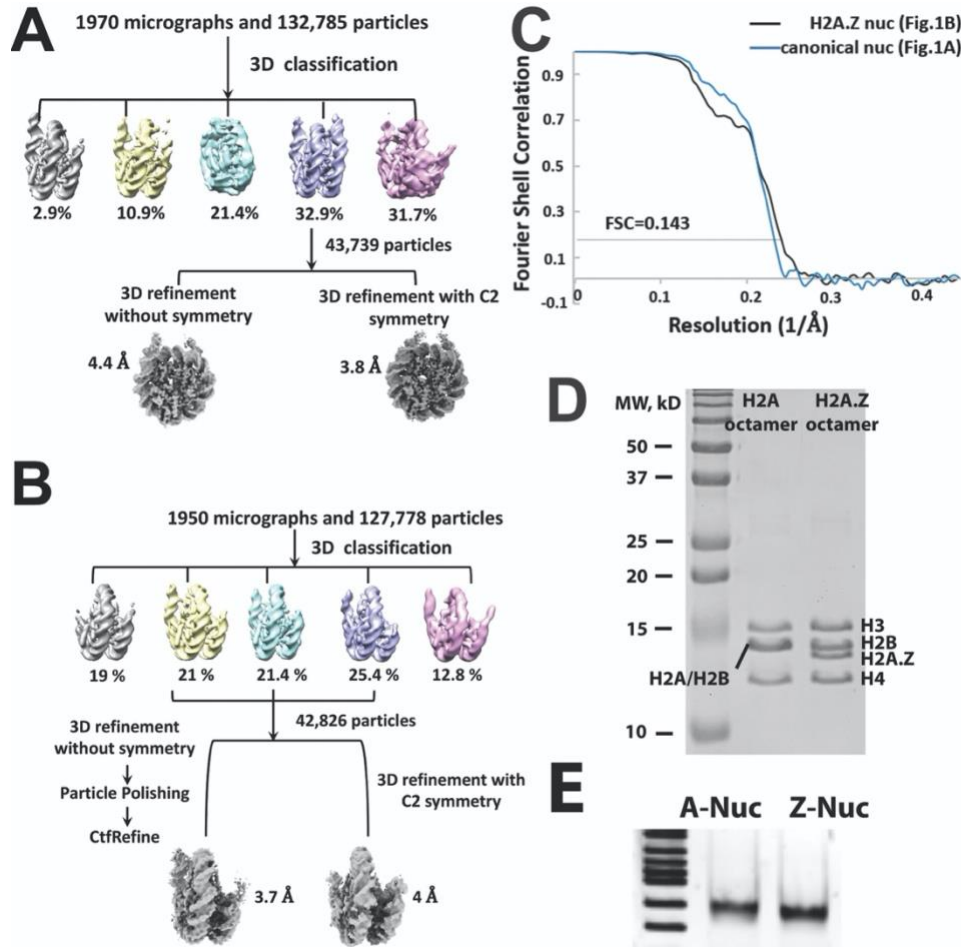

**Figure S1. Single-particle cryo-EM analysis of canonical nucleosome and H2A.Z nucleosome.**

(A) 3D classification and refinement procedures of the canonical nucleosome. One round of 3D classification with 132,785 particles were performed to separate the dataset into five classes. The class with the best resolution, accuracy of translation and rotation was also the most populated one. It was selected for further 3D refinement, with and without symmetry.

(B) 3D classification and refinement procedures of the H2A.Z nucleosome. One round of 3D classification with 127,778 particles were performed to separate the dataset into five classes. Three out of the five classes show similar overall structure, which also have better resolution, accuracy of translation and rotation compared to the rest of the two classes. These three classes were selected and combined for further 3D refinement, with and without symmetry.

(C) The Fourier shell Correlation between the half maps of the reconstructions of canonical nucleosome (Fig. 1A) and H2A.Z nucleosome (Fig. 1B), indicating a spatial resolution of 3.8 Å and 3.7 Å respectively. Resolution is given for the FSC 0.143.

(D) 18% SDS-PAGE acrylamide gel with Coomassie Brilliant Blue staining shows purified *Xenopus laevis* histone octamer and histone octamer containing mouse histone H2A.Z with *Xenopus* histone H2B, H3, H4.

(E) 3% Native-PAGE showing that the H2A.Z nucleosomes (Z-Nuc) migrate differently from the canonical nucleosomes (A-Nuc).

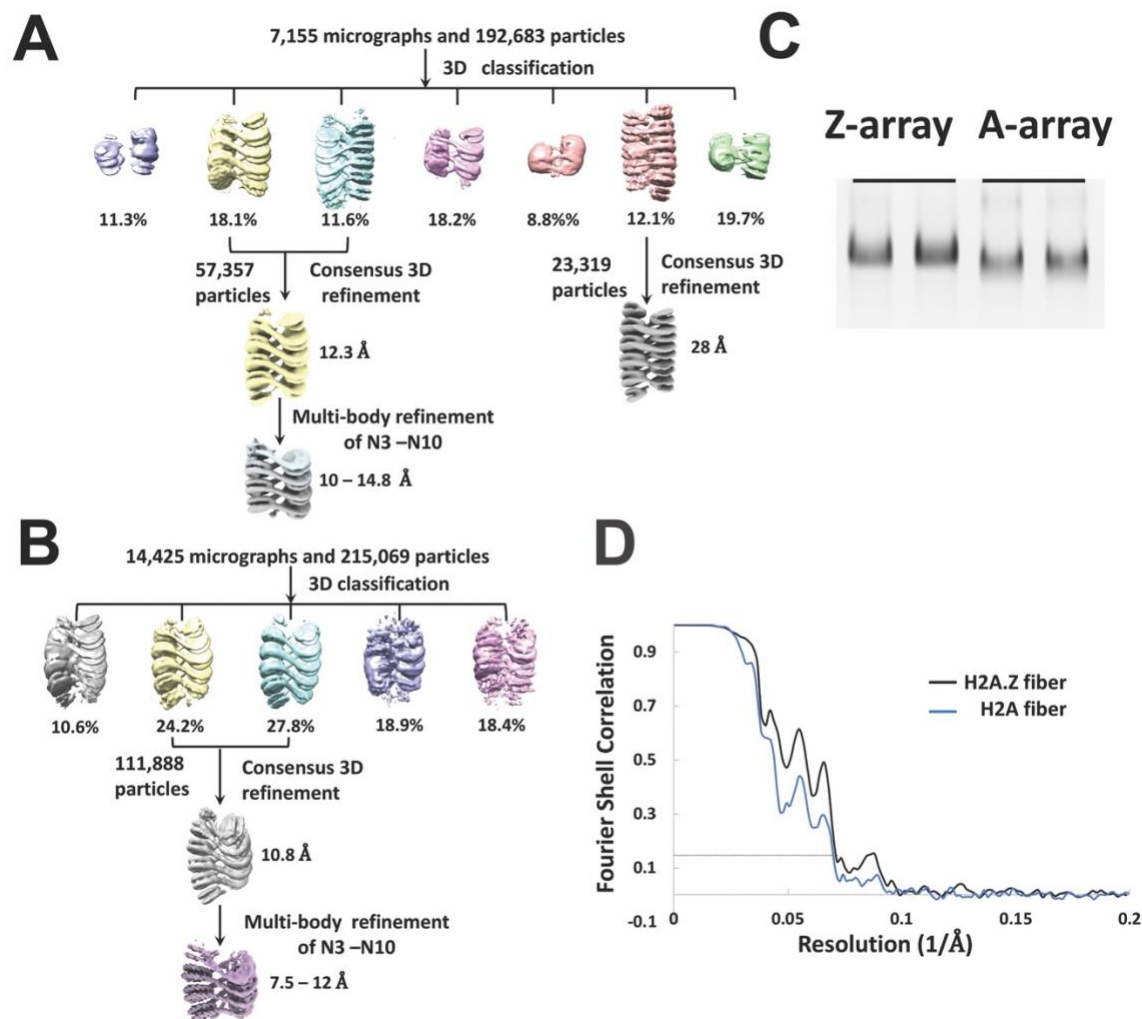

**Figure S2. Single-particle Cryo-EM analysis of H2A fiber and H2A.Z fiber.**

(A) 3D classification and refinement procedures of the H2A chromatin fiber. One round of 3D classification with 192,683 particles were performed to separate the dataset into seven classes. Two major conformations were identified, the twisted fiber and the parallel fiber. Two classes that belong to twisted conformation were combined for further consensus 3D refinement. Multi-body refinement was then performed based on the consensus refined map, to improve resolution of nucleosome N3-N10.

(B) 3D classification and refinement procedures of the H2A.Z chromatin fiber. One round of 3D classification with 215,069 particles were performed to separate the dataset into five classes, which all adopt a similar twisted fiber conformation. Two of these classes have the most visible structural features, best resolution, best accuracy of rotation and translation among the five classes. They were combined to undergo further consensus 3D refinement, followed by multi-body to improve resolution of nucleosome N3-N10.

(C) 3% Native-PAGE gel showing the H2A.Z nucleosome arrays (Z-array) migrate differently from the H2A nucleosome arrays (A-array).

(D) The Fourier shell Correlation between the half maps of the consensus refined structure of H2A fiber and H2A.Z, indicating a spatial resolution of 12.3 Å and 12 Å respectively. Resolution is given for the FSC 0.143.

**C-Fiber**

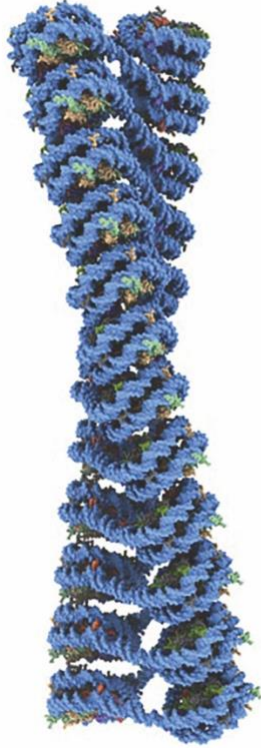

**Z-Fiber**

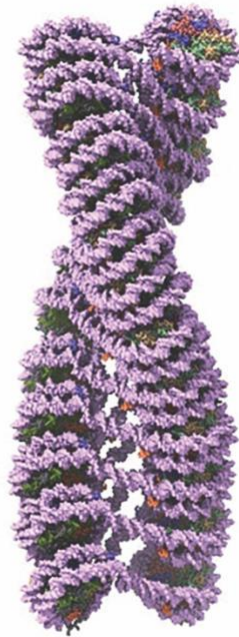

**Figure S3. Models of 24xnucleosome chromatin fiber containing canonical nucleosome and variant H2A.Z nucleosome respectively.**

H2A chromatin fiber with 24 x 167bp NRLs (left) and H2A.Z chromatin fiber with 24 x 167bp NRLs (right).

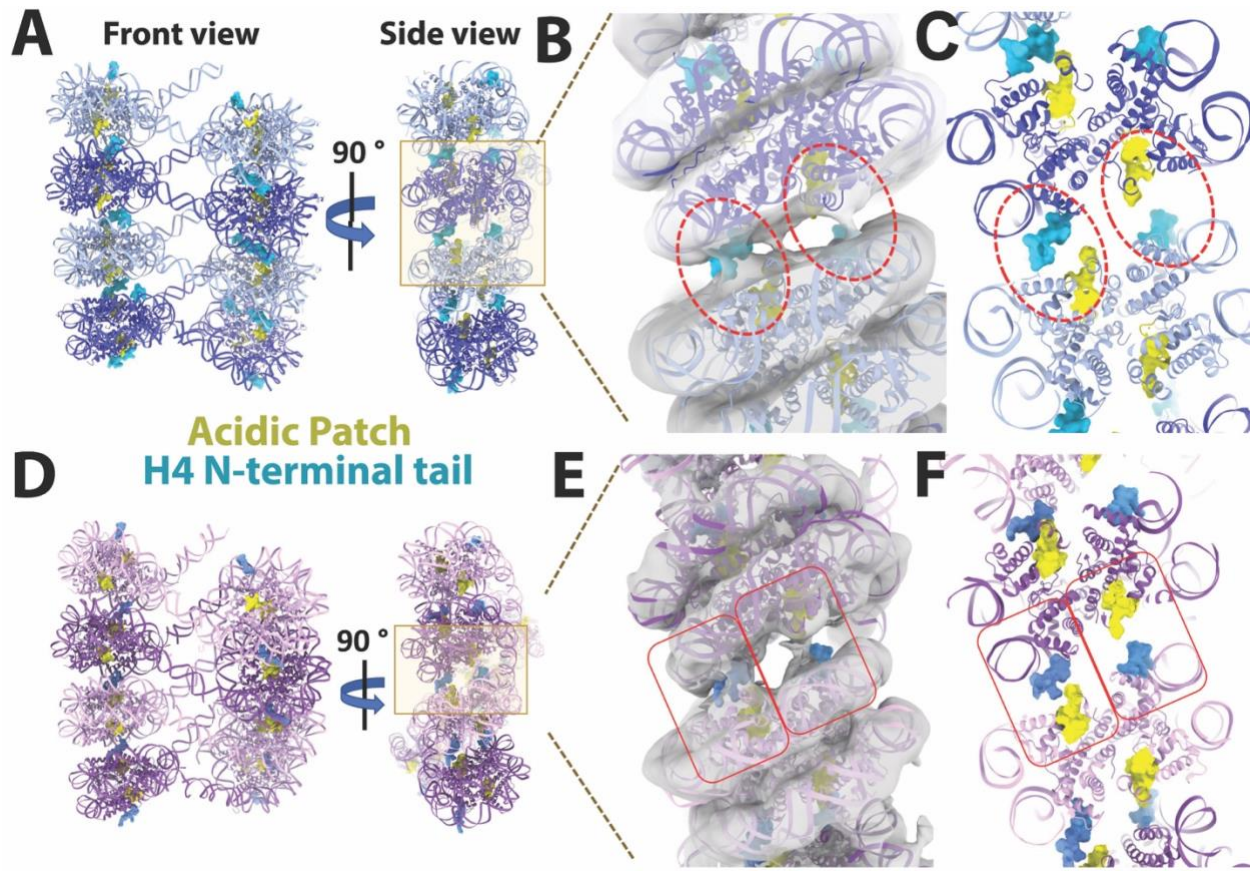

**Figure S4. H4 tail and acidic patch interactions at the inter-nucleosome interface.**  
**(A)** H2A fiber model with the acidic patch (yellow) on H2A-H2B dimer and part of the H4 N-terminal tail (blue) highlighted and shown in two different views.  
**(B)** Zoom-in view of the region in light gold box in **(A)** with the cryo-EM density, showing the two pairs of the H4 tail-acidic-patch (highlighted in red ovals) in the inter-nucleosome interface of the H2A fiber.  
**(C)** Same view of the region shown in **(B)** without the cryo-EM density map  
**(D)** H2A.Z fiber model with the acidic patch (yellow) on H2A-H2B dimer and part of the H4 N-terminal tail (blue) highlighted and shown in two different views.  
**(E)** Zoom-in view of the region in light gold box in **(C)** with the cryo-EM density, showing the two pairs of the H4-tail-acidic-patch (highlighted in red squares) in the inter-nucleosome interface of the H2A.Z fiber.  
**(F)** Same view of the region shown in **(E)** without the cryo-EM density map.

**Supplementary Data Table 1. Cryo-EM data collection**

| Dataset                                  | Canonical Nuc              | H2A.Z Nuc                  | H2A fiber                  |                          | H2A.Z fiber              |
|------------------------------------------|----------------------------|----------------------------|----------------------------|--------------------------|--------------------------|
| <b>Data acquisition and processing</b>   |                            |                            |                            |                          |                          |
| Microscope                               | 200kV Talos                | 200kV Talos                | 200kV                      | 300kV                    | 300kV Titan              |
| Voltage (kV)                             | Arctica                    | Arctica                    | Arctica                    | Krios                    | Krios                    |
| Detector                                 | Falcon 3EC                 | Falcon 3EC                 | Falcon 3EC                 | K3                       | K3                       |
| Defocus range ( $\mu\text{m}$ )          | -0.9 to -2.5 $\mu\text{m}$ | -0.9 to -2.5 $\mu\text{m}$ | -0.9 to -2.5 $\mu\text{m}$ | -1 to -2.5 $\mu\text{m}$ | -1 to -2.5 $\mu\text{m}$ |
| Initial particle images (no.)            | 132,785                    | 127,778                    | 192,683                    |                          | 215,069                  |
| Final particle images (no.)              | 43,739                     | 42,826                     | 57,357                     |                          | 111,888                  |
| Map resolution ( $\text{\AA}$ )          | 3.7                        | 3.8                        | 12.3                       |                          | 12.0                     |
| FSC threshold                            | 0.143                      | 0.143                      | 0.143                      |                          | 0.143                    |
| Symmetry                                 | C2                         | C1                         | C1                         |                          | C1                       |
| Map sharpening B-factor ( $\text{\AA}$ ) | -178.798                   | -114.198                   | -548.459                   |                          | -389.5                   |

## Supplementary Data Table 2. Model refinement and validation of H2A.Z nucleosome

| <b>Refinement</b>             | <b>H2A.Z nucleosome structure<br/>PDB ID 7M1X, EMD-23626</b> |
|-------------------------------|--------------------------------------------------------------|
| Initial model used (PDB code) | 1F66, 6FQ5                                                   |
| Model resolution (Å)          | 3.7                                                          |
| Model composition             |                                                              |
| Protein residues              | 746                                                          |
| Nucleotides                   | 272                                                          |
| <br>                          |                                                              |
| R.m.s. deviations             |                                                              |
| Bond length (Å)               | 0.007                                                        |
| Bond angle (°)                | 0.769                                                        |
| <br>                          |                                                              |
| <b>Validation</b>             |                                                              |
| Molprobity Score              | 2.01                                                         |
| Molprobity clashscore         | 6.51                                                         |
| Rotamer outlier (%)           | 2.27                                                         |
| C $\beta$ deviation (%)       | 0.00                                                         |
| Ramachandran plot (%)         |                                                              |
| Favored                       | 94.38                                                        |
| Allowed                       | 5.48                                                         |
| Outliers                      | 0.14                                                         |

**Supplemental Data Table 3. Initial rate of Hinfl digestion for H2A.Z wild-type and mutant nucleosomes relative to the H2A nucleosome control**

| Nucleosome substrate             | Initial rate of digestion relative to H2A nucleosome | P value (difference in initial rate relative to H2A nucleosome control) |
|----------------------------------|------------------------------------------------------|-------------------------------------------------------------------------|
| H2A (Fig 3G)                     | 1                                                    | N/A                                                                     |
| H2A.Z (Fig 3G)                   | 2.31                                                 | 0.015997                                                                |
| H2A.Z C-terminus mutant          | 1.35                                                 | 0.21592144                                                              |
| H2A (Fig 3H)                     | 1                                                    | N/A                                                                     |
| H2A.Z (Fig 3H)                   | 1.46                                                 | 0.000526                                                                |
| H2A.Z C-terminus-extended mutant | 1.15                                                 | 0.24548367                                                              |
